# Supplementary material for: Blood vessel and osteocyte networks concurrently rearrange during bone maturation and decline during aging in the femur of male mice
Source: publisher site journal article supplement (doi:10.18632/aging.206302), 2025-08-22
Supplement: Supplementary file [file aging-v17-206302-supplementary-material-SD1.pdf]

## SUPPLEMENTARY FIGURES

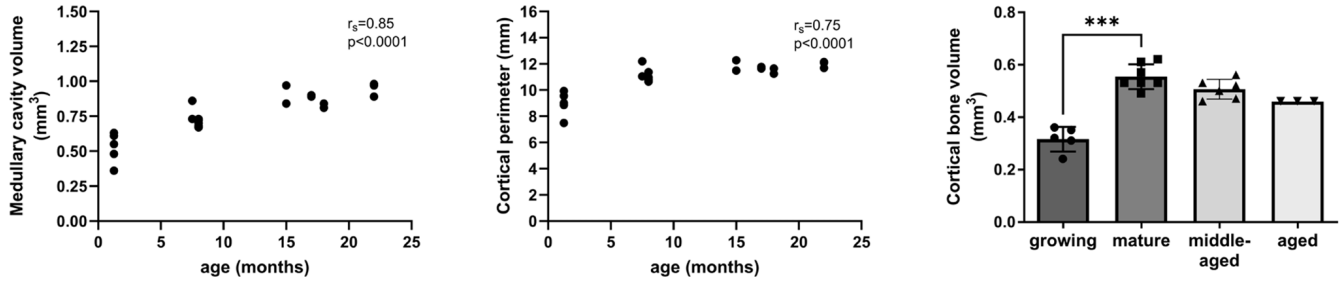

**Supplementary Figure 1. MicroCT analysis of femur for the 4 age groups.** Correlation between the medullary cavity volume and age, between the cortical perimeter and age, and comparison of the cortical bone volume between the 4 age groups. The data are presented as mean  $\pm$  s.d. Statistical analyses: Spearman's correlation, KW, Dunn's multiple comparison test with the mature group as reference, \*\*\* $p < 0.001$ .

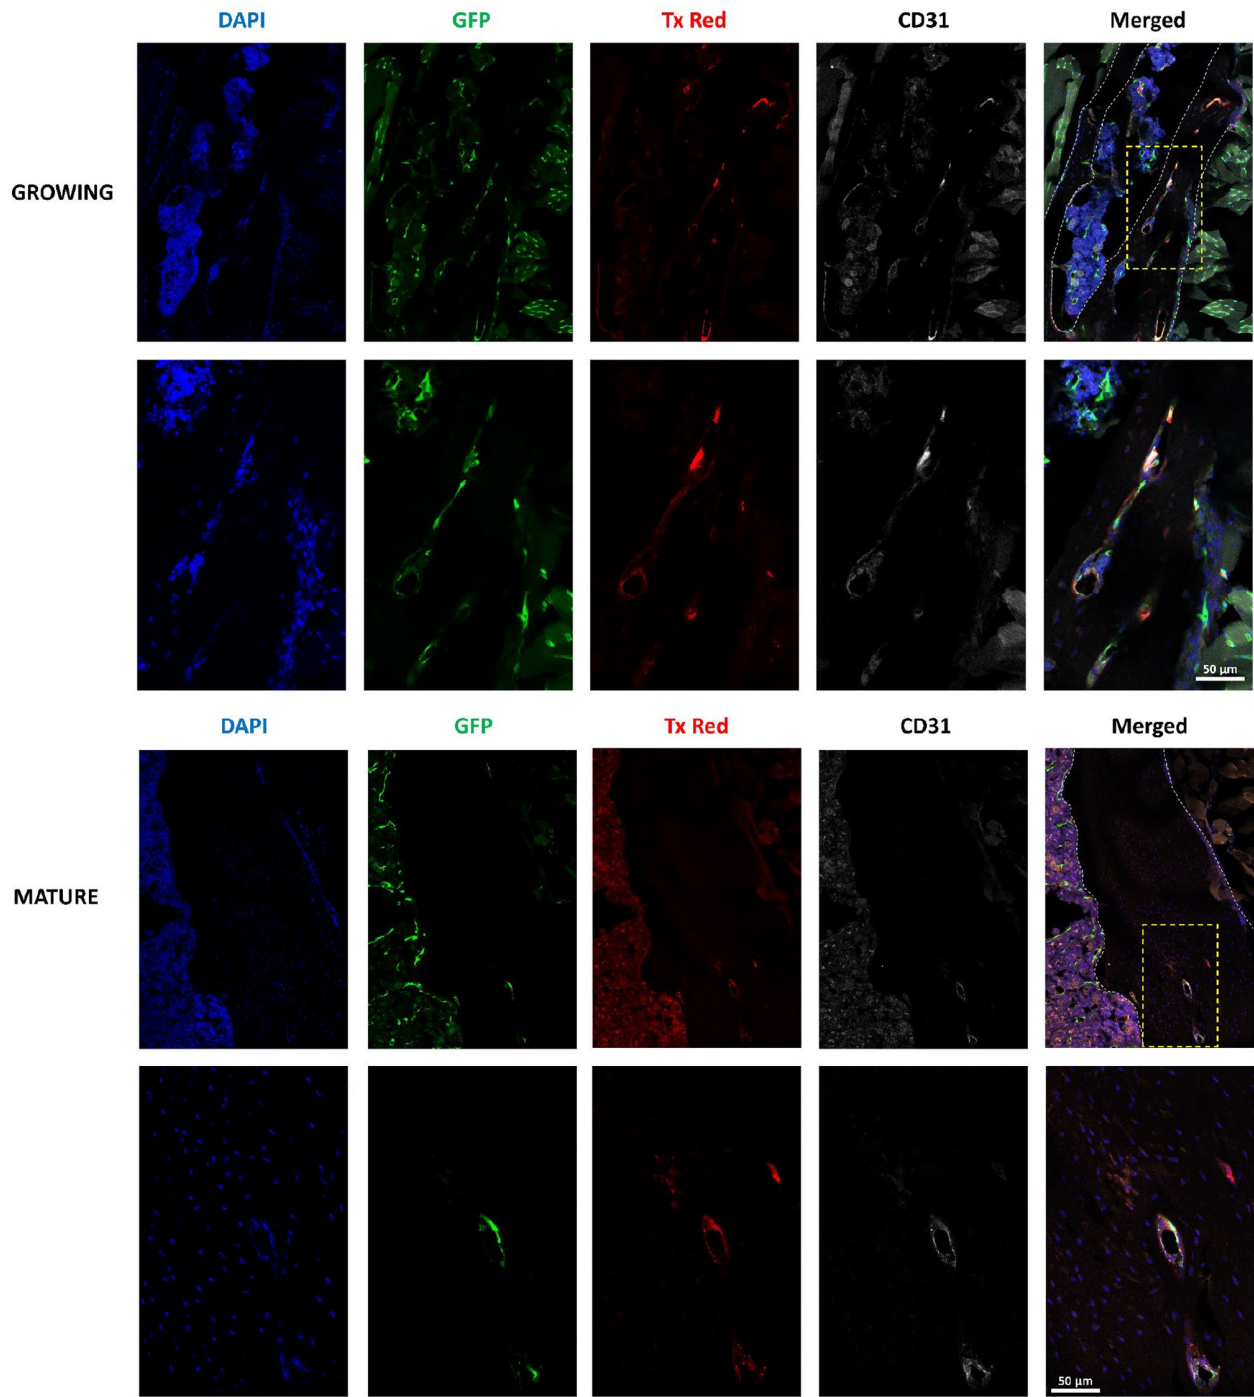

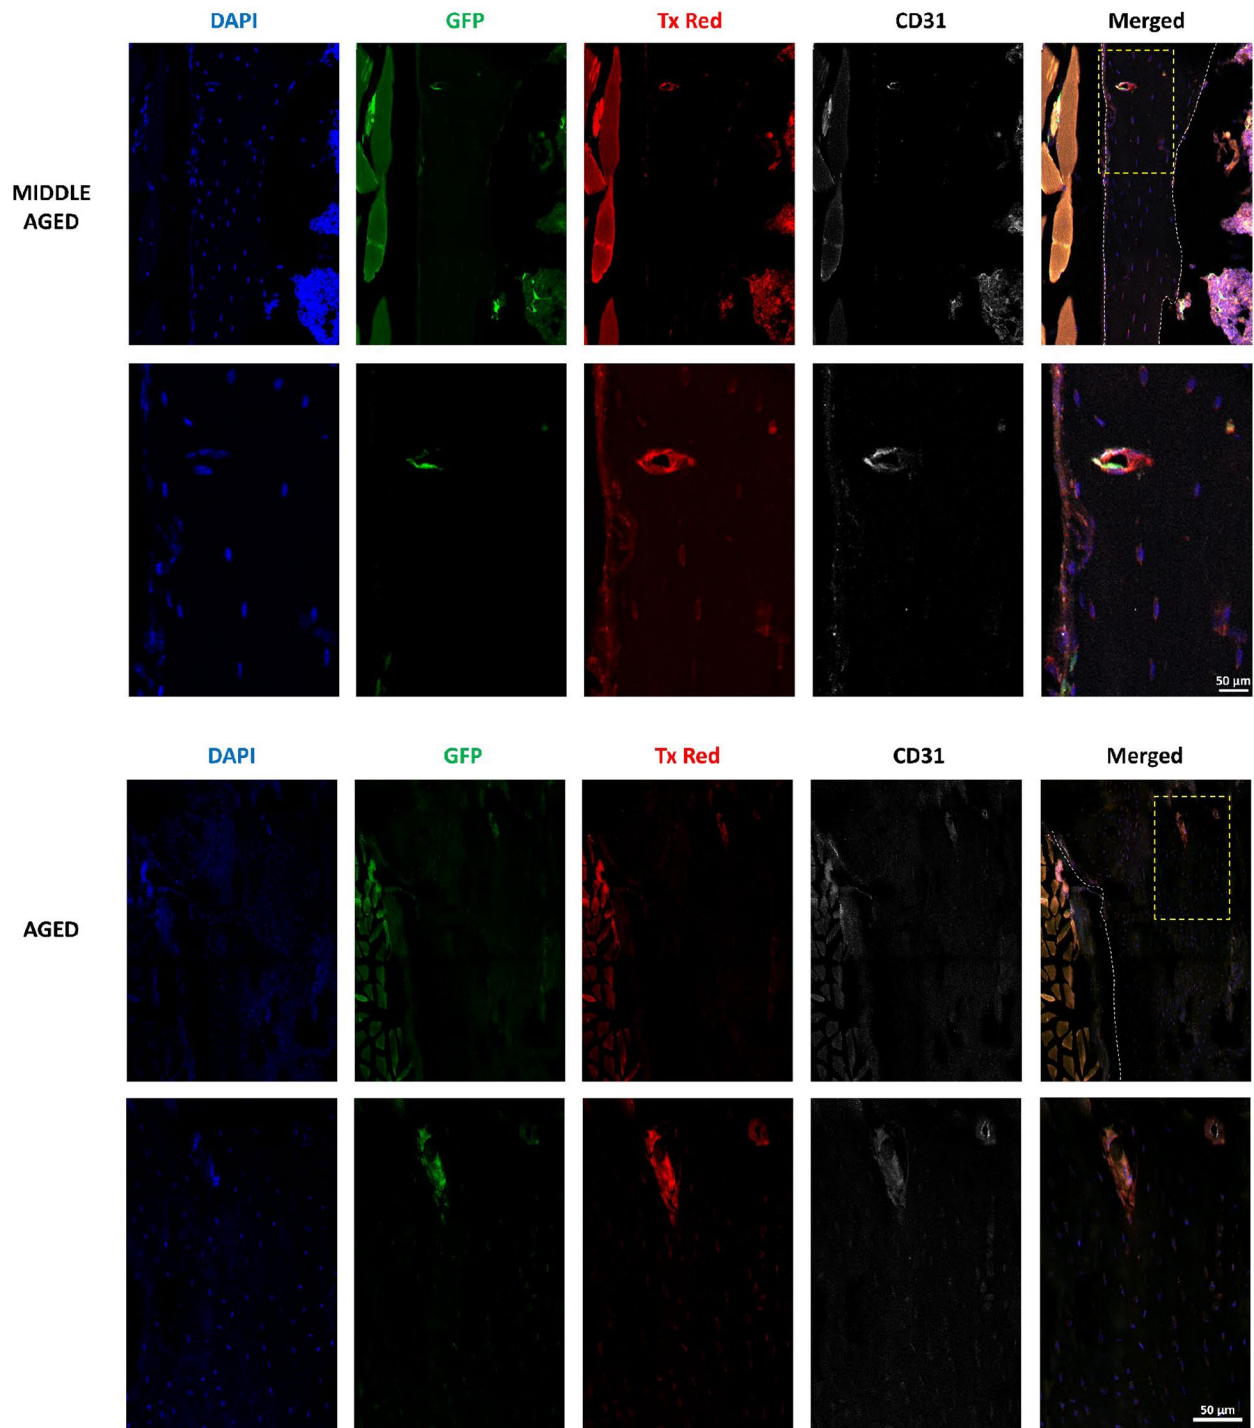

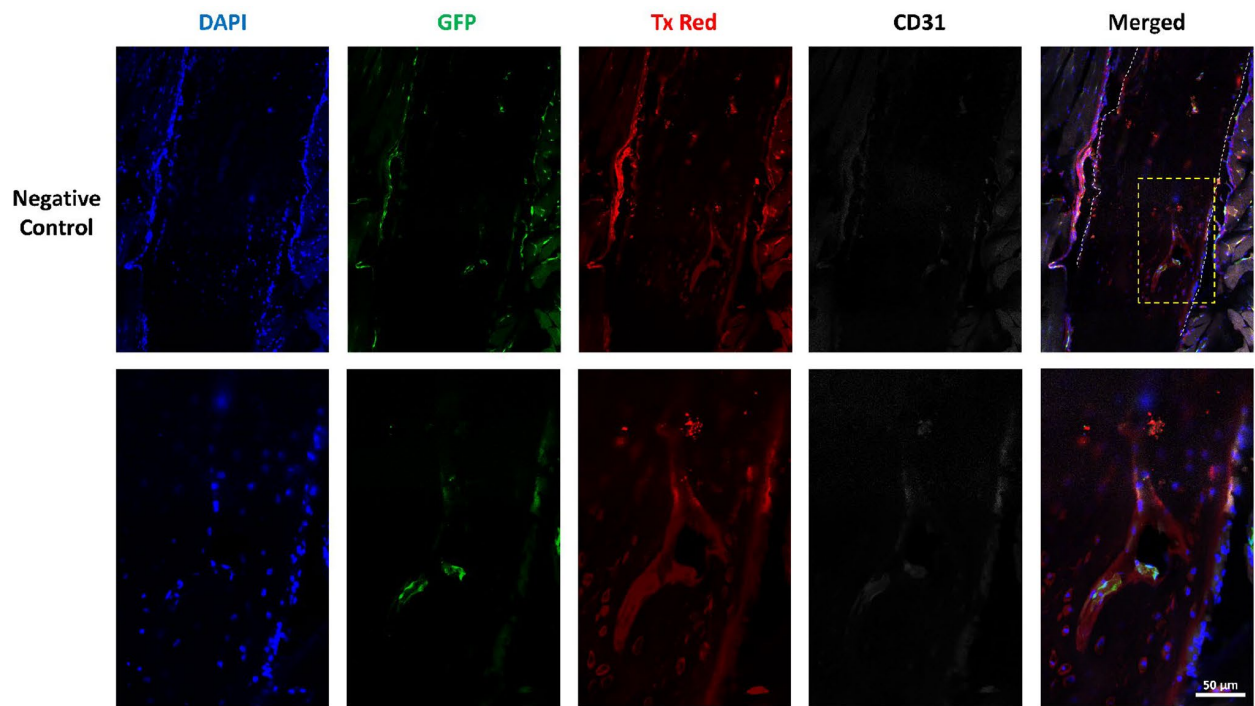

**Supplementary Figure 2. Characterization of the blood vessels in the cortical bone.** Images showing the co-localization of endogenous GFP, immunolabeling of CD31 in the blood vessels with diffused Texas Red-Dextran in the channels the cortical bone. DAPI in blue, GFP in green, Texas Red-Dextran in red, CD31 in white.



**growing**

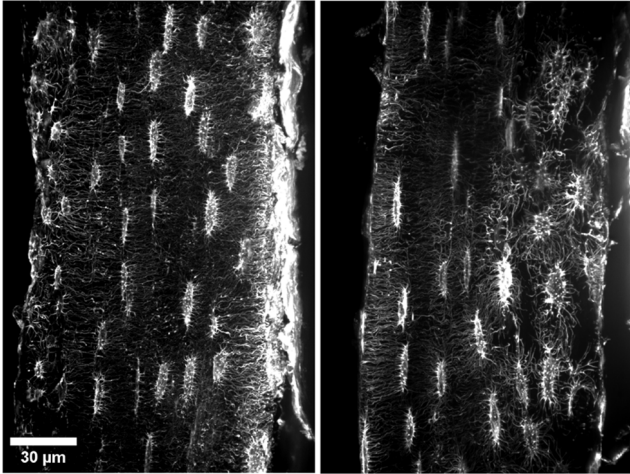

**mature**

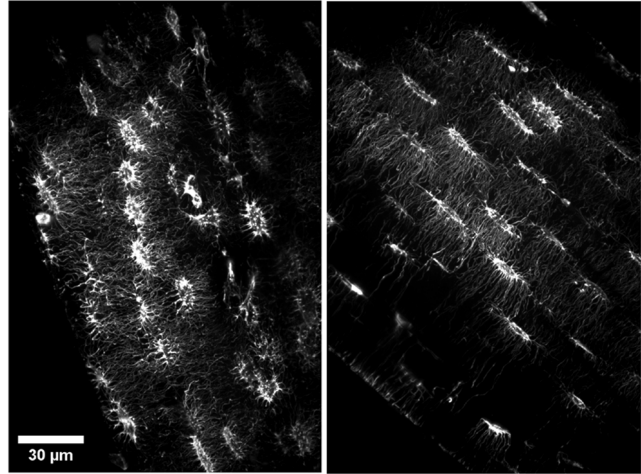

**middle-aged**

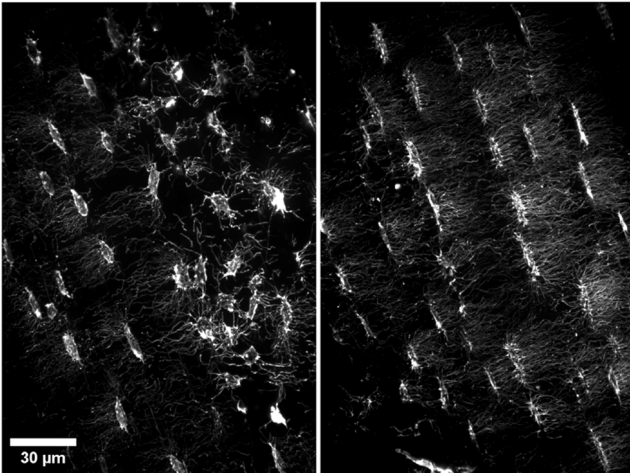

**aged**

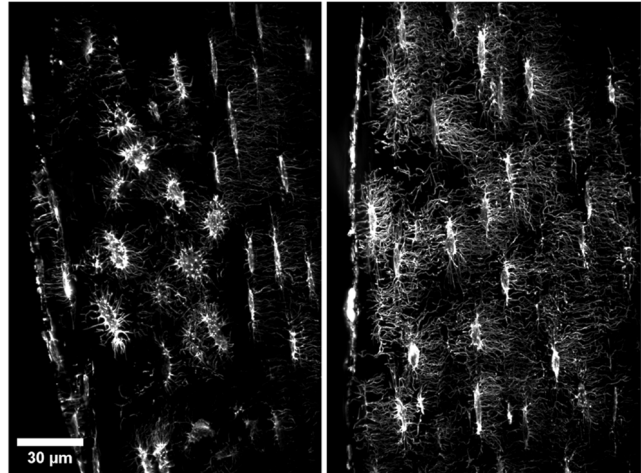

**Supplementary Figure 3. Heterogeneity in the organization of the osteocyte network in the 4 groups studied. Phalloidin labeling in white.**

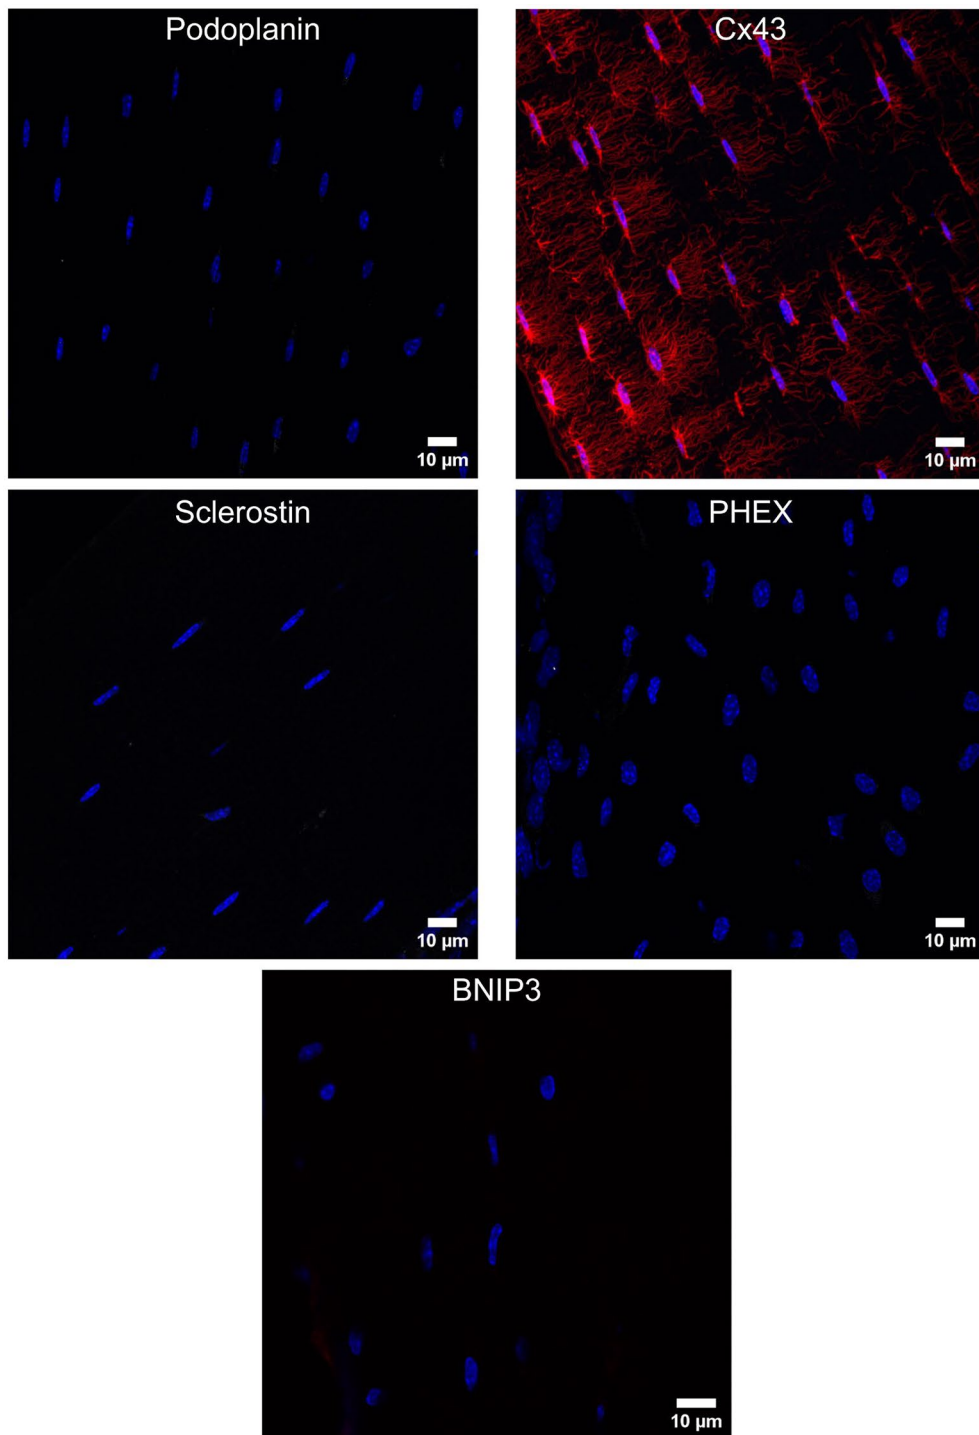

Supplementary Figure 4. Images of the negative controls for the Podoplanin, Cx43, Sclerostin, PHEX and BNIP3 immunofluorescences.
